# Supplementary material for: Metal–organic framework-derived shuttle-like V2O3/C for electrocatalytic N2 reduction under ambient conditions
Source: Royal Society of Chemistry journal article supplement (doi:10.1039/c8qi01145a), 2018-12-04
Supplement: c8qi01145a1.pdf [file c8qi01145a1.pdf]

## Electronic Supplementary Information

### Experimental section

*Materials:* Vanadium(III) chloride ( $\text{VCl}_3$ ), sodium sulfate ( $\text{Na}_2\text{SO}_4$ ), ammonium chloride ( $\text{NH}_4\text{Cl}$ ), terephthalic acid ( $\text{H}_2\text{BDC}$ ), sodium citrate dehydrate ( $\text{C}_6\text{H}_5\text{Na}_3\text{O}_7 \cdot 2\text{H}_2\text{O}$ ), *p*-dimethylaminobenzaldehyde ( $\text{C}_9\text{H}_{11}\text{NO}$ ), sodium nitroferricyanide dihydrate ( $\text{C}_5\text{FeN}_6\text{Na}_2\text{O} \cdot 2\text{H}_2\text{O}$ ), sodium hypochlorite solution ( $\text{NaClO}$ ) and graphite powder were purchased from Aladdin Ltd. (Shanghai, China). Nafion (5 wt%) solution was purchased from Sigma-Aldrich Chemical Reagent Co., Ltd. Hydrochloric acid, nitric acid, sulfuric acid, hydrazine monohydrate ( $\text{N}_2\text{H}_4 \cdot \text{H}_2\text{O}$ ) and ethyl alcohol ( $\text{C}_2\text{H}_5\text{OH}$ ) were purchased from Kelong chemical Ltd. in Chengdu. The ultrapure water used throughout all experiments was purified through a Millipore system. All reagents were analytical reagent grade without further purification.

*Preparation of V MOF and  $\text{V}_2\text{O}_3/\text{C}$ :* V MOF was prepared according to the literature.<sup>1</sup> In a typical procedure, 314 mg of  $\text{VCl}_3$  and 332 mg of terephthalic acid were mixed in a 50-mL beaker. Then, a solution containing 2 mL of HCl ( $1 \text{ mol} \cdot \text{L}^{-1}$ ) and 10 mL of absolute ethyl alcohol was added under vigorous stirring at room temperature. After 30 min, the resulting blue suspension was further dispersed with ultrasonic treatment for 15 min. Finally, the mixture was transferred to a 50-mL Teflon-lined stainless-steel autoclave and heated in an electrical oven at  $120 \text{ }^\circ\text{C}$  for 2 day. The green powder, i.e., V MOF, were obtained via centrifugation with ethanol and dried in vacuum at  $50 \text{ }^\circ\text{C}$  for 8 h. To obtain porous shuttlelike  $\text{V}_2\text{O}_3/\text{C}$ , the V MOF was annealed in Ar atmosphere at  $700 \text{ }^\circ\text{C}$  for 6 h, with a heating rate of  $2 \text{ }^\circ\text{C} \cdot \text{min}^{-1}$ .

*Preparation of working electrode:* CP was cleaned via brief sonication with ethanol and water for several times. To prepare the working electrode, 10 mg of the  $\text{V}_2\text{O}_3/\text{C}$  and 40  $\mu\text{L}$  5 wt% Nafion solution were dispersed in 960  $\mu\text{L}$  water/ethanol (V : V = 1 : 2) followed by 1 h sonication to form a homogeneous ink. 20  $\mu\text{L}$  of the catalyst suspension was loaded onto a CP ( $1 \times 1 \text{ cm}^2$ ) and dried in Ar atmosphere at room temperature.

*Characterizations:* XRD patterns were performed using a LabX XRD-6100 X-ray

diffractometer with Cu K $\alpha$  radiation ( $\lambda = 1.5418 \text{ \AA}$ ) at 40 kV and 40 mA. SEM images were collected on a XL30 ESEM FEG scanning electron microscope at an accelerating voltage of 20 kV. The structures of the samples were determined by TEM images on a HITACHI H-8100 electron microscopy (Hitachi, Tokyo, Japan) operated at 200 kV. XPS measurements were performed on an ESCALABMK II X-ray photoelectron spectrometer using Mg as the exciting source. Raman spectra were obtained by a Renishaw inVia confocal Raman microprobe under 532 nm laser excitation. The absorbance data of spectrophotometer were measured on UV-Vis spectrophotometer. Thermal gravimetric analysis (TGA) was performed on a Perkin-Elmer Model Pyris1 TGA apparatus at a heating rate of  $10 \text{ }^\circ\text{C min}^{-1}$  in air.

*Electrochemical measurements:* Electrochemical NRR measurements were performed in a two-compartment cell separated by Nafion 211 membrane using a CHI 660E electrochemical analyzer (CH Instruments, Inc.). The electrochemical experiments were carried out with a three-electrode configuration using graphite plate as the counter electrode and Ag/AgCl/saturated KCl as the reference electrode. In all measurements, saturated Ag/AgCl electrode was calibrated with respect to RHE as following: in 0.1 M Na<sub>2</sub>SO<sub>4</sub> aqueous solution,  $E(\text{RHE}) = E(\text{Ag}/\text{AgCl}) + 0.059 \times \text{pH} + 0.197 \text{ V}$ . All experiments were carried out at room temperature ( $\sim 25 \text{ }^\circ\text{C}$ ). For N<sub>2</sub> reduction experiments, the Na<sub>2</sub>SO<sub>4</sub> electrolyte (35 mL) was purged with N<sub>2</sub> for 30 min before the measurement. Pure N<sub>2</sub> was continuously fed into the cathodic compartment with a flow rate of  $10 \text{ cm}^3 \text{ min}^{-1}$  during the experiments. The electrolyte itself was analyzed for detection of NH<sub>3</sub> before each potentiostatic test to ensure there was no contamination of NH<sub>3</sub> from the environment.

*Determination of NH<sub>3</sub>:* 4 mL of sample was removed from the cathodic chamber, then added into 50  $\mu\text{L}$  of oxidizing solution containing NaClO ( $\rho_{\text{Cl}} = 4\sim 4.9$ ) and NaOH (0.75 M), then added 500  $\mu\text{L}$  coloring solution containing 0.4 M C<sub>6</sub>H<sub>5</sub>Na<sub>3</sub>O<sub>7</sub>·2H<sub>2</sub>O and 0.32 M NaOH and 50  $\mu\text{L}$  catalyst solution (0.1 g Na<sub>2</sub>[Fe(CN)<sub>5</sub>NO]·2H<sub>2</sub>O diluted to 10 ml with deionized water) in turn. Absorbance measurements were performed after one hour at  $\lambda = 660 \text{ nm}$ . The calibration curve ( $y = 0.734x + 0.013$ ,  $R^2=0.999$ ) shows good linear relation of absorbance value with NH<sub>3</sub> concentration by three times

independent calibrations.

NH<sub>3</sub> yield was calculated using the following equation:  $\text{NH}_3 \text{ yield} = (c_{\text{NH}_3} \times V) / (t \times m)$ . FE was calculated according to following equation:  $\text{FE} = 3 \times F \times c_{\text{NH}_3} \times V / (17 \times Q)$ , where  $c_{\text{NH}_3}$  is the measured NH<sub>3</sub> concentration, V is the volume of the cathodic reaction electrolyte, t is the reduction reaction time, m is the catalyst mass, F is the Faraday constant, and Q is the quantity of applied electricity.

*Determination of N<sub>2</sub>H<sub>4</sub>*: A mixture of p-C<sub>9</sub>H<sub>11</sub>NO (5.99 g), HCl (concentrated, 30 mL) and C<sub>2</sub>H<sub>5</sub>OH (300 mL) was used as a color reagent. In detail, 5 mL electrolyte was removed from the electrochemical reaction vessel, and added into 5 mL above prepared color reagent and stirring 10 min at room temperature. The absorbance of the resulting solution was measured at 455 nm. The calibration curve ( $y = 0.397x + 0.032$ ,  $R^2 = 0.999$ ) shows good linear relation of absorbance value with N<sub>2</sub>H<sub>4</sub> concentration by three times independent calibrations.

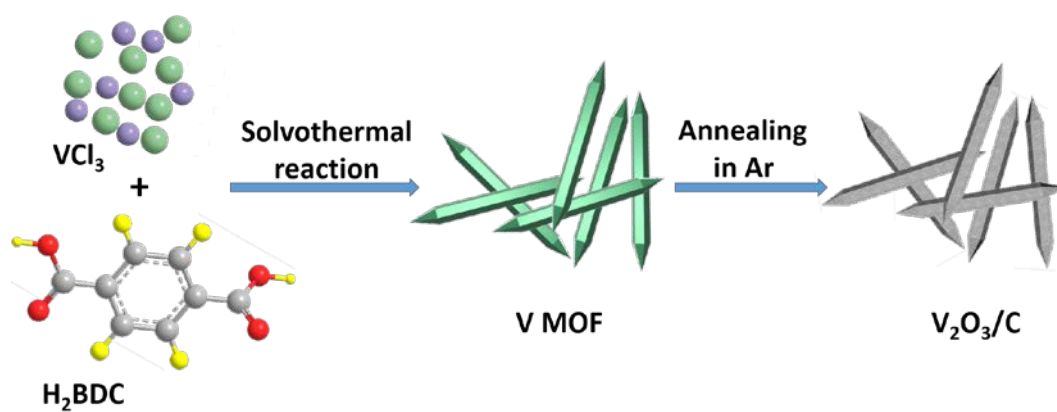

**Scheme S1.** Illustration of preparation process for shuttle-like  $V_2O_3/C$ .

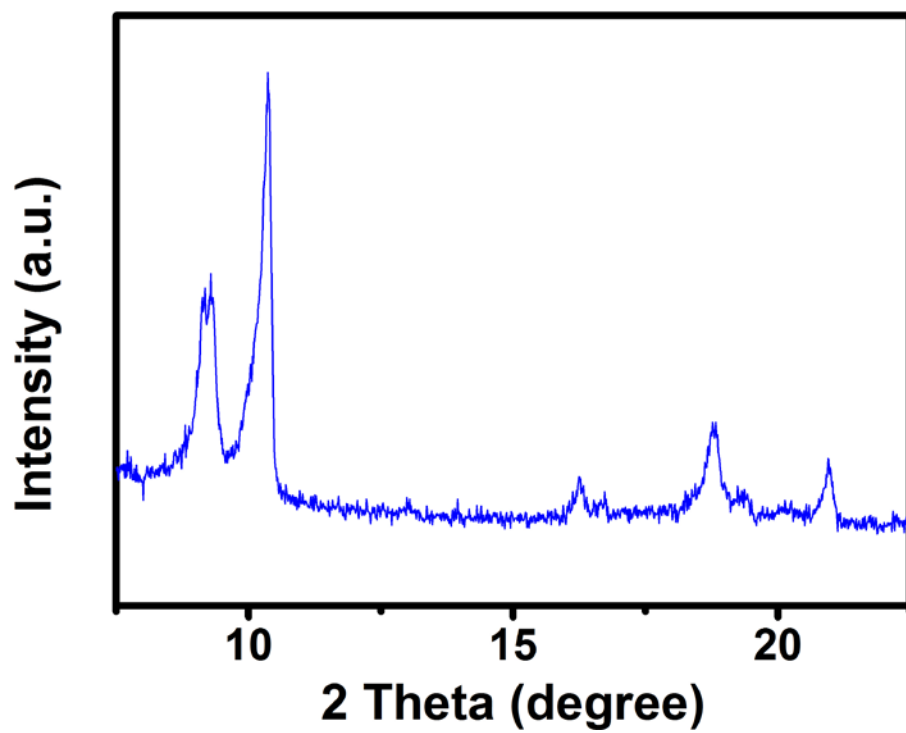

**Fig. S1.** XRD pattern of V MOF.

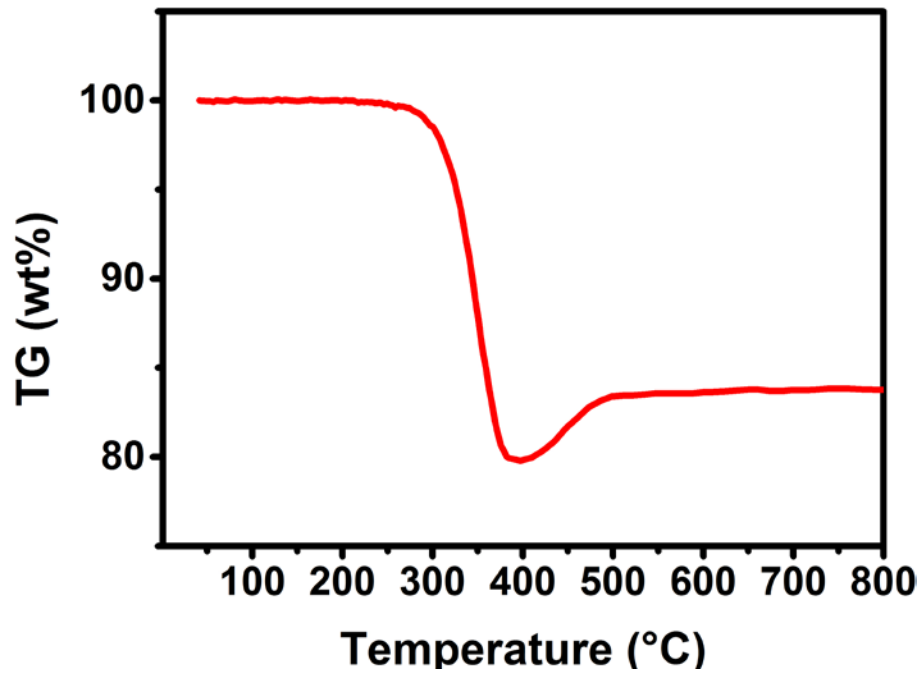

**Fig. S2.** TGA curve of V<sub>2</sub>O<sub>3</sub>/C.

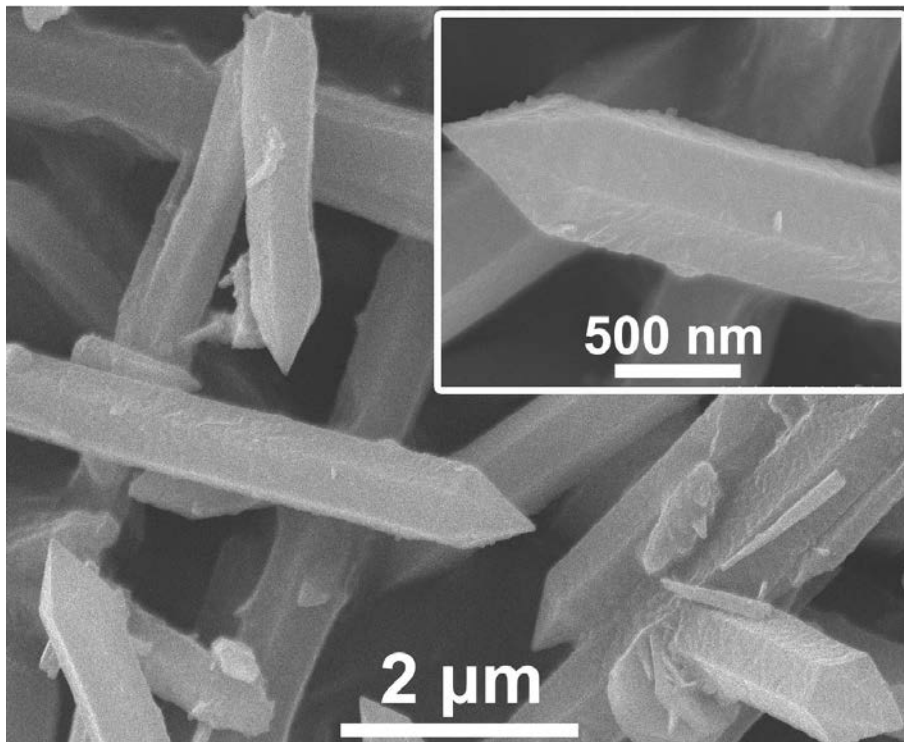

**Fig. S3.** SEM images of V MOF.

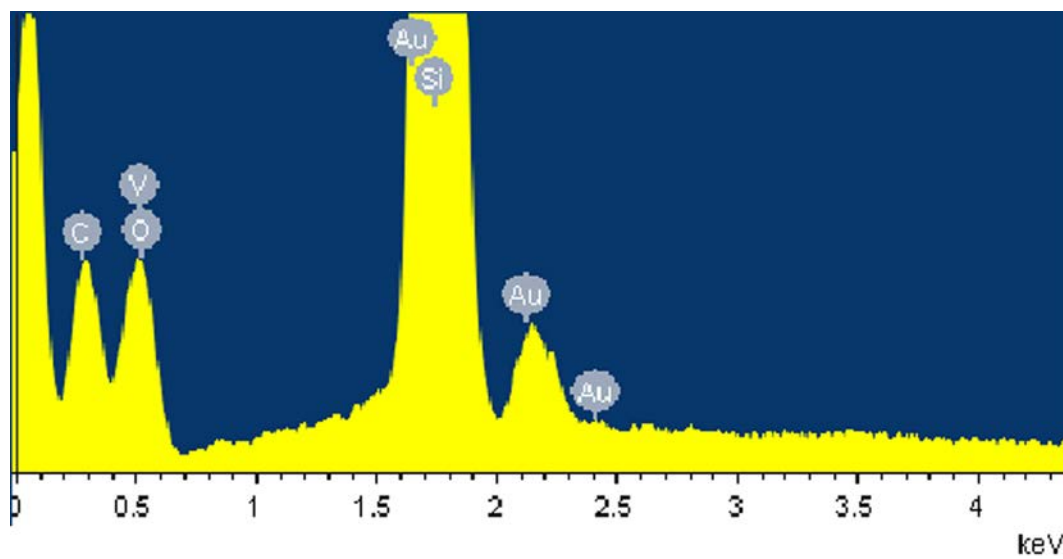

**Fig. S4.** EDX spectrum of  $V_2O_3/C$  (note: Au signal arises from the sprayed Au species on the sample surface to enhance the conductivity for SEM and EDX characterizations; Si signal arises from the Si substrate).



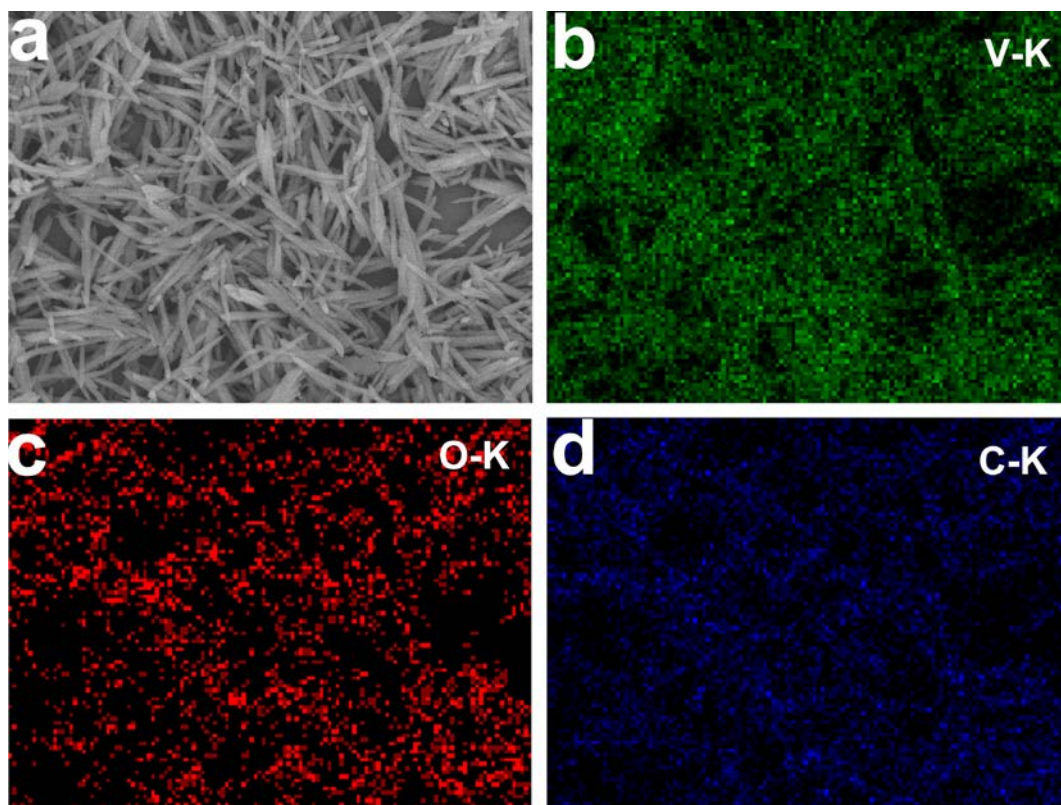

**Fig. S5.** (a) SEM image and EDX elemental mapping images of (b) V, (c) O, and (d) C elements in  $V_2O_3/C$ .

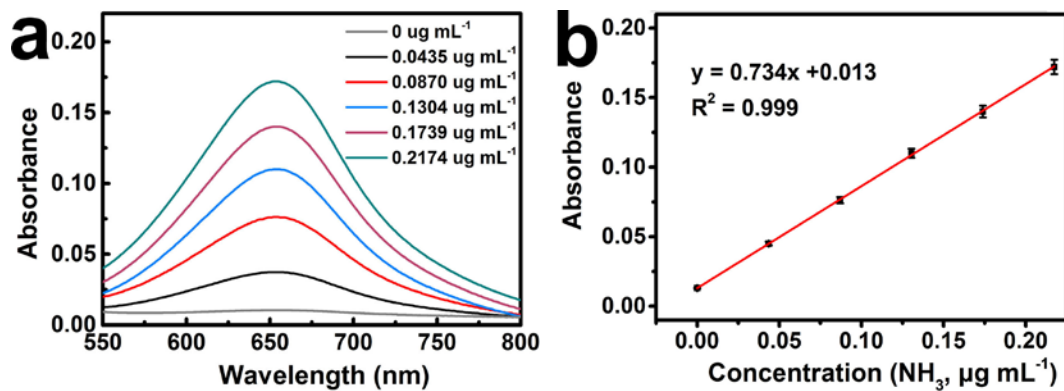

**Fig. S6.** (a) UV-Vis absorption spectra of indophenol assays with different  $\text{NH}_4^+$  concentrations after incubated for 2 h at room temperature. (b) Calibration curve used for calculation of  $\text{NH}_3$  concentrations.

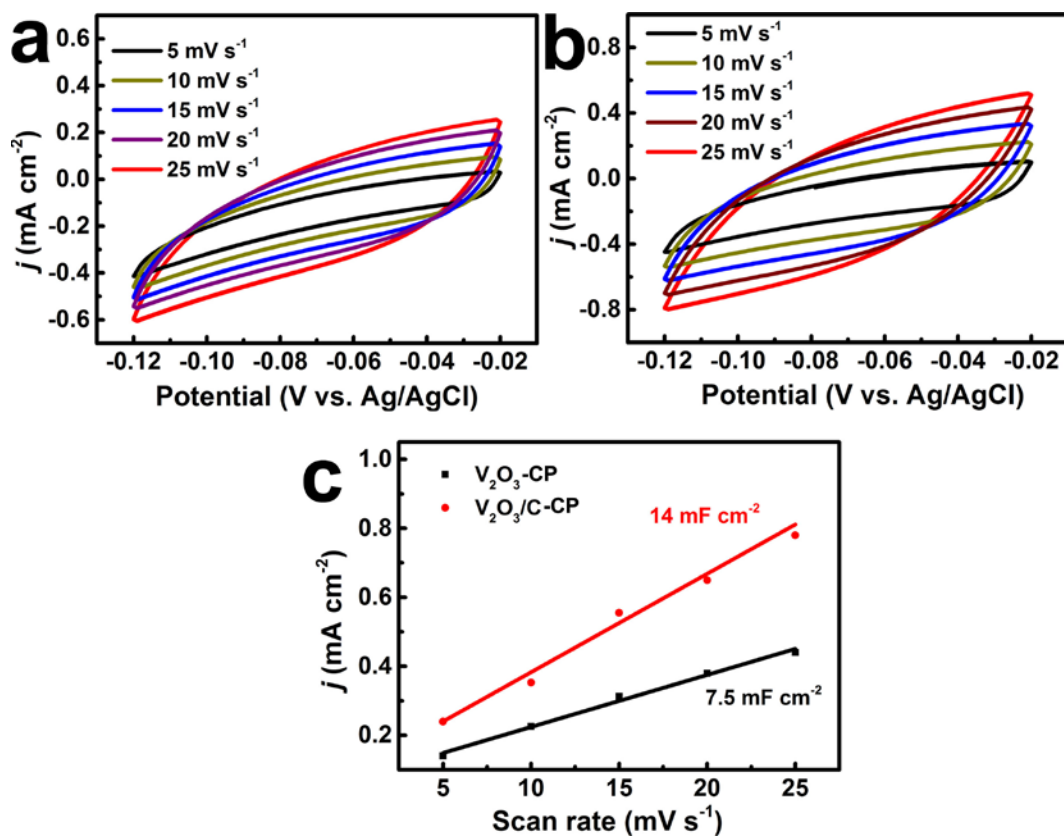

**Fig. S7.** Cyclic voltammetry curves of (a) V<sub>2</sub>O<sub>3</sub>/C-CP and (b) V<sub>2</sub>O<sub>3</sub>-CP with various scan rates in the region of -0.02 to -0.12 V vs. Ag/AgCl. (c) The capacitive current densities at -0.07 V vs. Ag/AgCl as a function of scan rates for V<sub>2</sub>O<sub>3</sub>/C-CP and V<sub>2</sub>O<sub>3</sub>-CP.

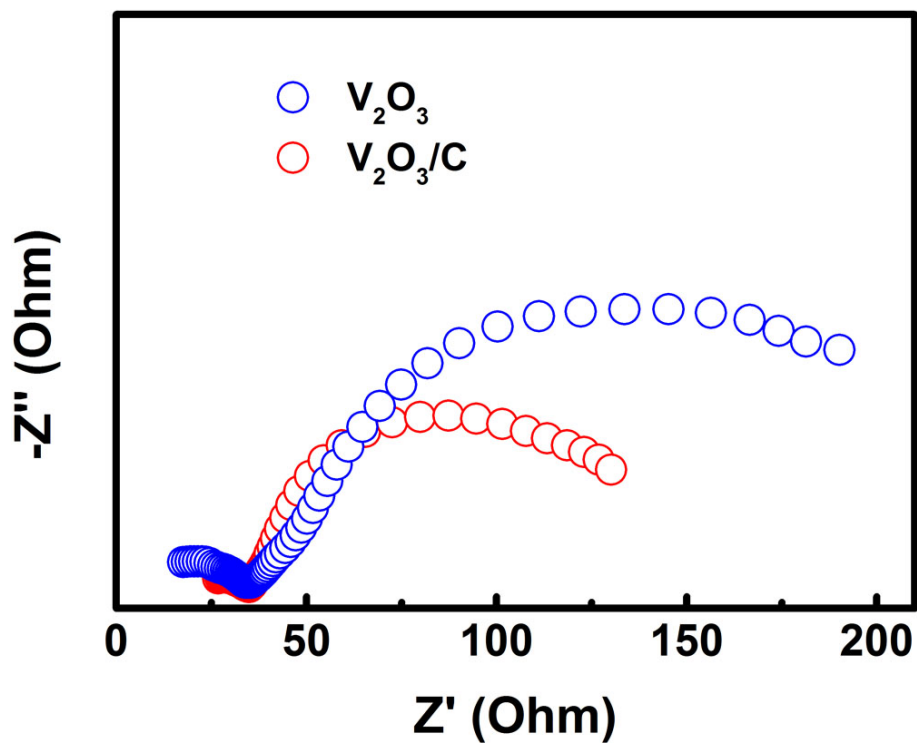

**Fig. S8.** Nyquist plots of  $V_2O_3/C$ -CP and  $V_2O_3$ -CP at open circuit potential.

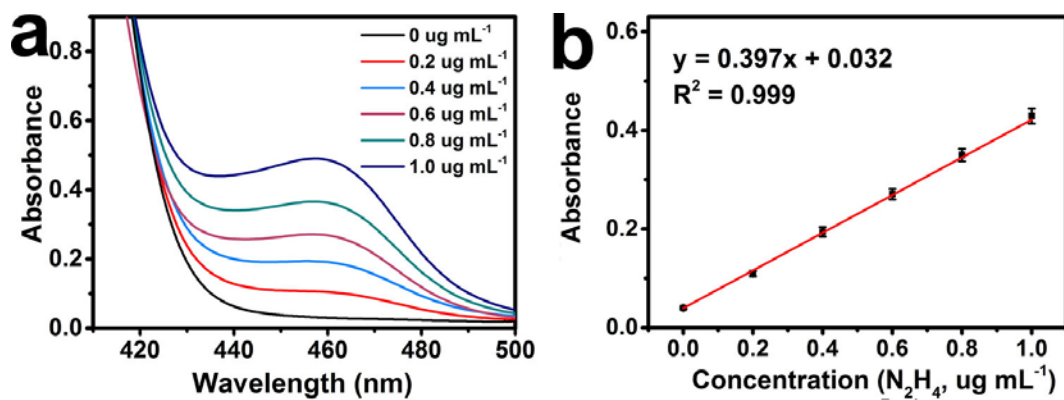

**Fig. S9.** UV-Vis absorption spectra of various  $\text{N}_2\text{H}_4$  concentrations after incubated for 10 min at room temperature. (b) Calibration curve used for calculation of  $\text{N}_2\text{H}_4$  concentrations.

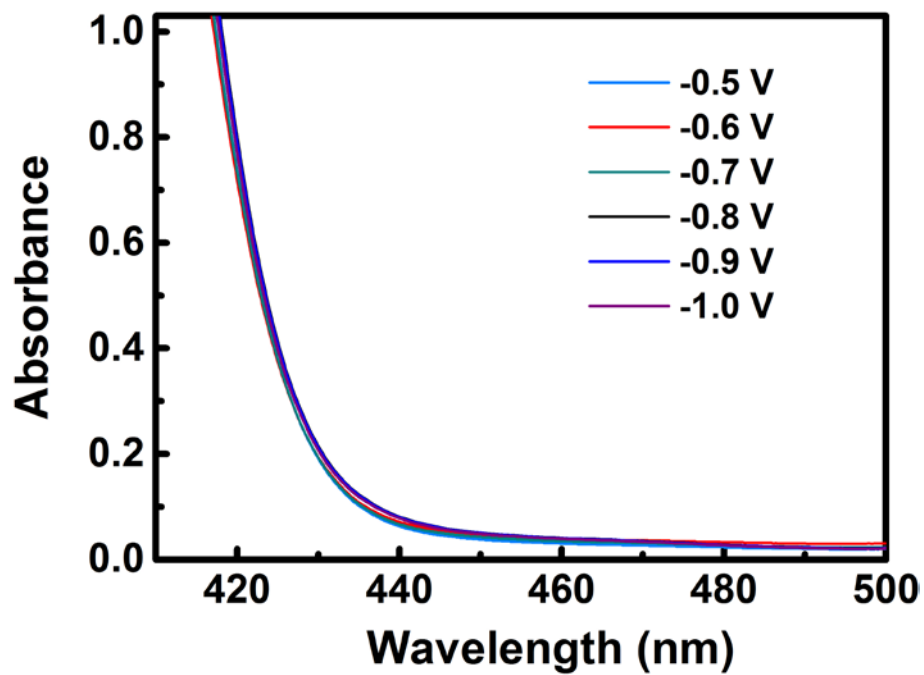

**Fig. S10.** UV-Vis absorption spectra of electrolytes stained with p-C<sub>9</sub>H<sub>11</sub>NO after 2-h electrolysis at different potentials using post-NRR V<sub>2</sub>O<sub>3</sub>/C-CP.

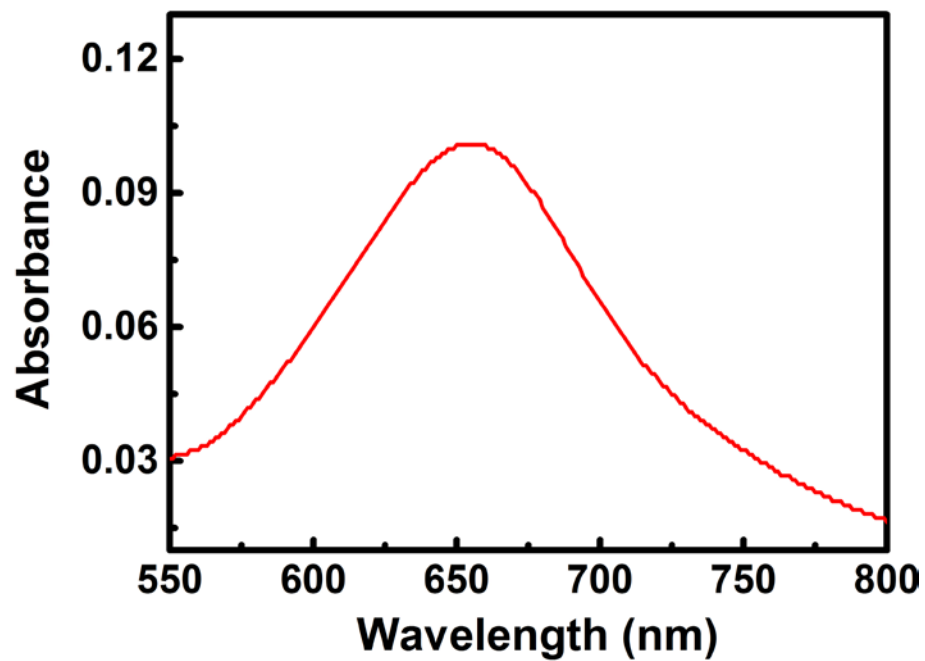

**Fig. S11.** UV-Vis absorption spectra of electrolyte stained with indophenol indicator after 2-h potentiostatic test at  $-0.6$  V using post-NRR  $V_2O_3/C$ -CP.

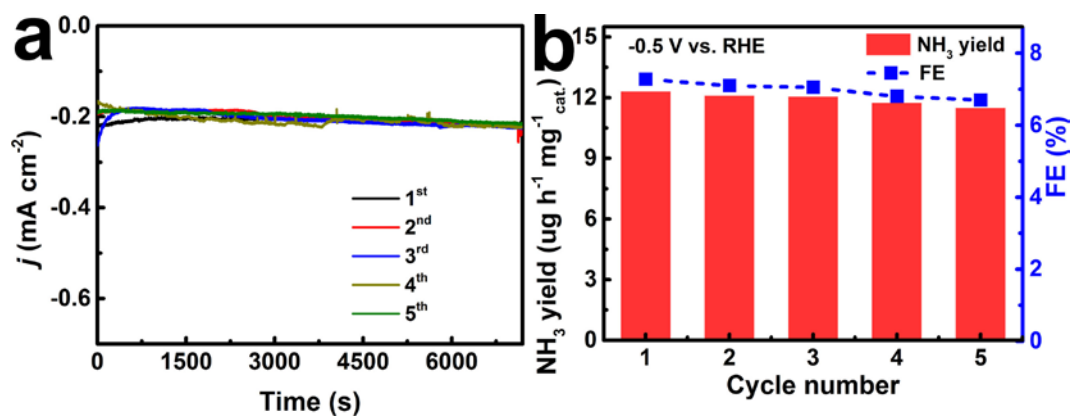

**Fig. S12.** (a) Chronoamperometric curves of V<sub>2</sub>O<sub>3</sub>/C-CP at -0.6 V for 5 times. (b) NH<sub>3</sub> yields and FEs of V<sub>2</sub>O<sub>3</sub>/C-CP at -0.6 V for 5 cycles.



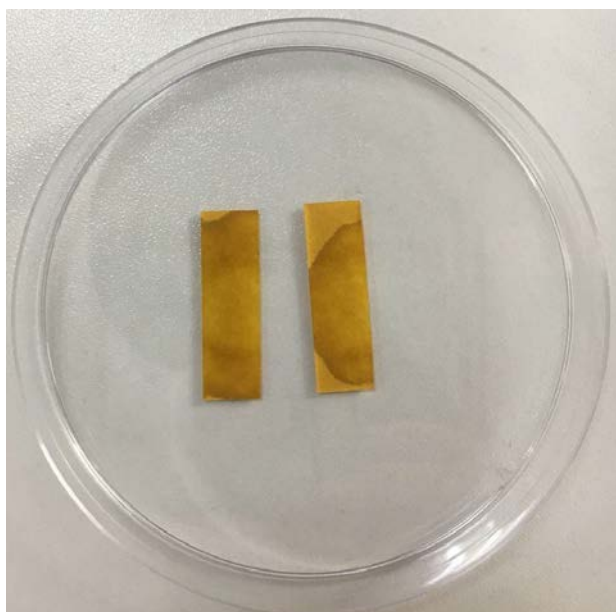

**Fig. S13.** Photograph of pH test papers of electrolytes before (left) and after (right) electrolysis.

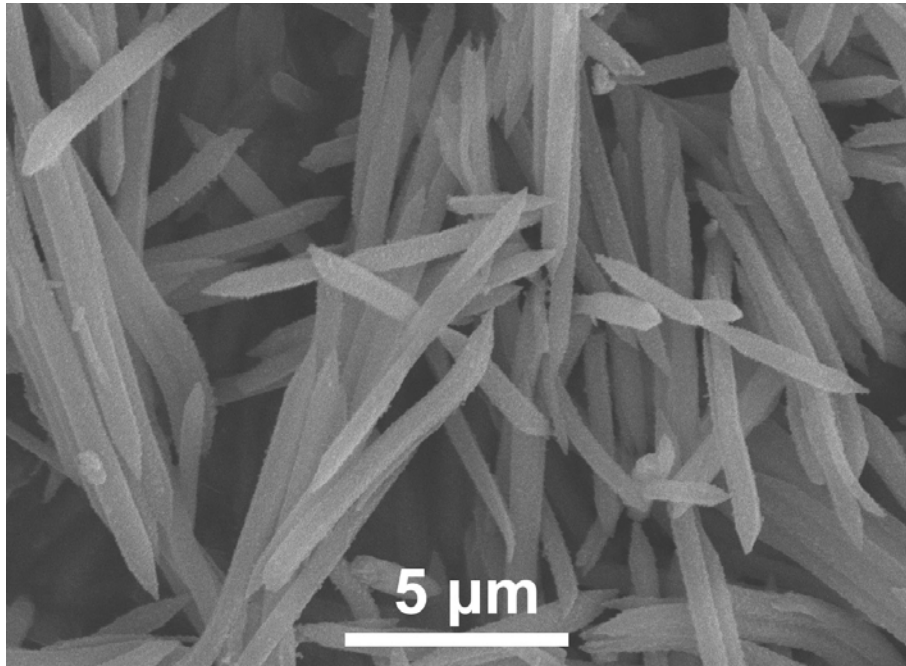

**Fig. S14.** SEM image of post-NRR  $V_2O_3/C$ .

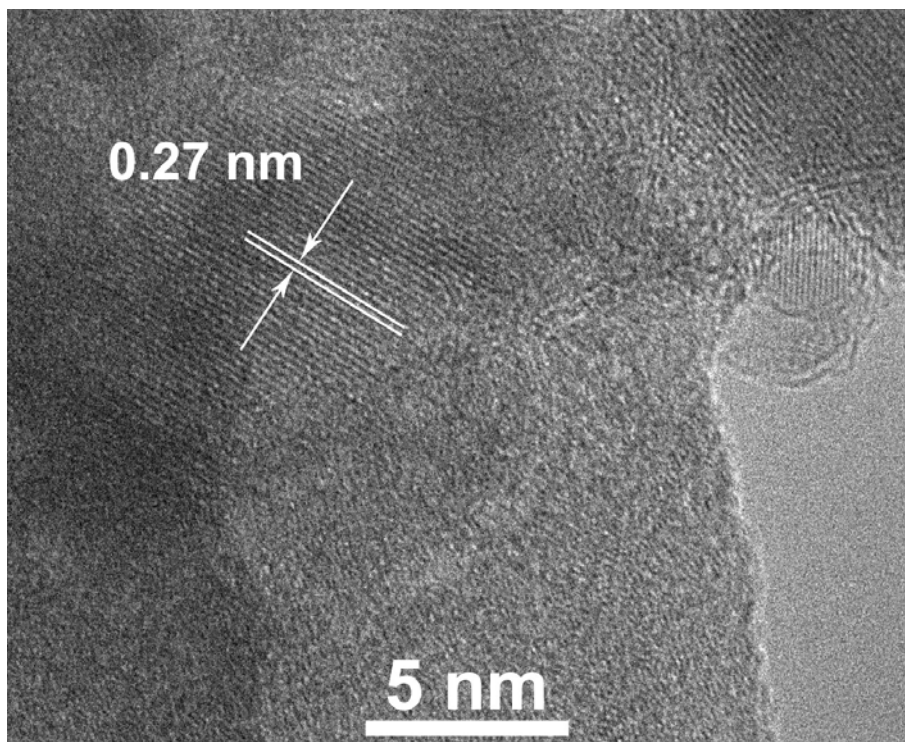

**Fig. S15.** HRTEM image of post-NRR V<sub>2</sub>O<sub>3</sub>/C.

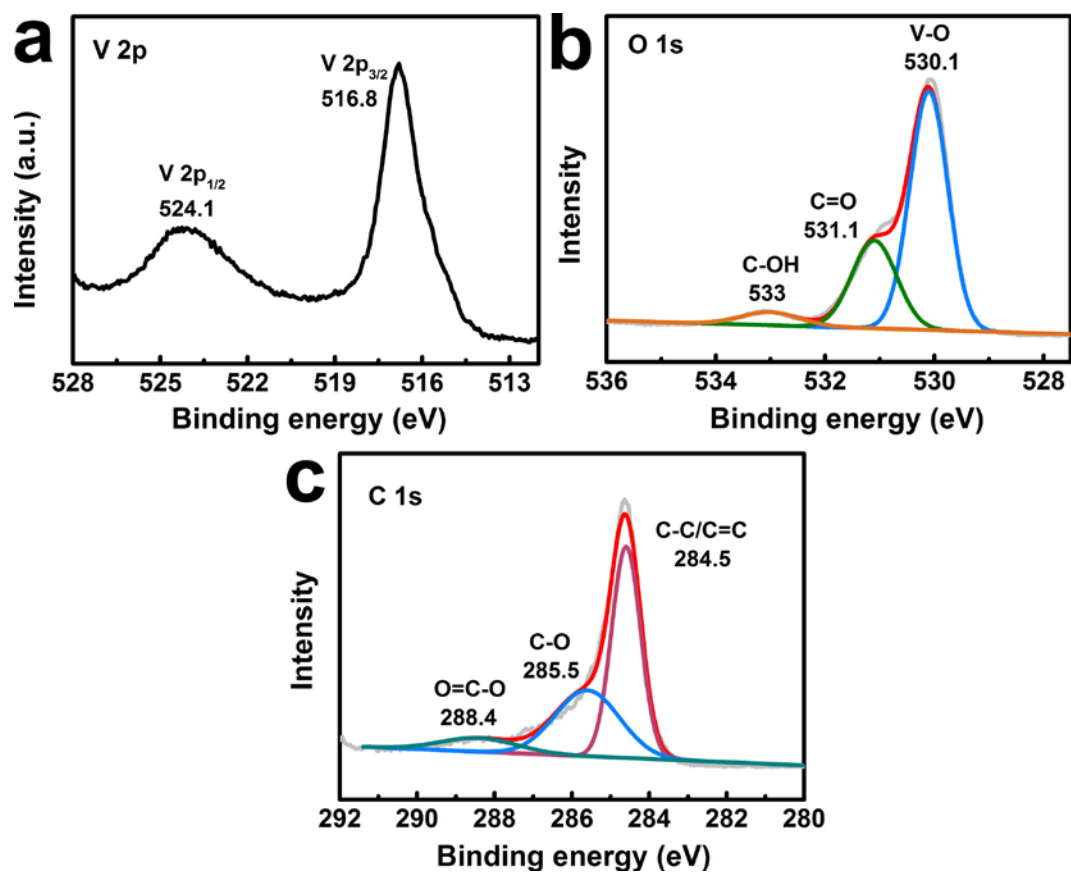

**Fig. S16.** XPS spectra of post-NRR  $V_2O_3/C$  in the (a) V 2p, (b) O 1s, and (c) C 1s regions.

**Table S1.** The values of Q at different potentials obtained from the potentiostat.

| Potential (V) | Q (C)  |
|---------------|--------|
| -0.5          | 0.72   |
| -0.6          | 1.152  |
| -0.7          | 1.512  |
| -0.8          | 2.1924 |
| -0.9          | 4.68   |
| -1            | 11.052 |

**Table S2.** Comparison of electrocatalytic NRR performance for V<sub>2</sub>O<sub>3</sub>/C with other electrocatalysts under ambient conditions.

| Catalyst                                                         | Electrolyte                           | NH <sub>3</sub> yield                                                                                   | FE (%) | Ref.      |
|------------------------------------------------------------------|---------------------------------------|---------------------------------------------------------------------------------------------------------|--------|-----------|
| V <sub>2</sub> O <sub>3</sub> /C                                 | 0.1 M Na <sub>2</sub> SO <sub>4</sub> | 12.3 μg h <sup>-1</sup> mg <sup>-1</sup> <sub>cat.</sub><br>(2.46 μg h <sup>-1</sup> cm <sup>-1</sup> ) | 7.28   | This work |
| α-Au/CeO <sub>x</sub> -RGO                                       | 0.1 M HCl                             | 8.31 μg h <sup>-1</sup> mg <sup>-1</sup> <sub>cat.</sub>                                                | 10.1   | 2         |
| TA-reduced Au/TiO <sub>2</sub>                                   | 0.1 M HCl                             | 21.4 μg h <sup>-1</sup> mg <sup>-1</sup> <sub>cat.</sub>                                                | 8.11   | 3         |
| Au nanorods                                                      | 0.1 M KOH                             | 1.6 μg h <sup>-1</sup> cm <sup>-2</sup>                                                                 | 3.88   | 4         |
| Rh                                                               | 0.1 M KOH                             | 23.88 μg h <sup>-1</sup> mg <sup>-1</sup> <sub>cat.</sub>                                               | 0.217  | 5         |
| Pd <sub>0.2</sub> Cu <sub>0.8</sub> /rGO                         | 0.1 M KOH                             | 2.8 μg h <sup>-1</sup> mg <sup>-1</sup> <sub>cat.</sub>                                                 | 4.5    | 6         |
| Pd/C                                                             | 0.1M PBS                              | 4.5 μg h <sup>-1</sup> mg <sup>-1</sup> <sub>cat.</sub>                                                 | 8.2    | 7         |
| PEBCD/C                                                          | 0.5 M Li <sub>2</sub> SO <sub>4</sub> | 1.58 μg h <sup>-1</sup> cm <sup>-2</sup>                                                                | 2.85   | 8         |
| γ-Fe <sub>2</sub> O <sub>3</sub>                                 | 0.1 M KOH                             | 0.212 μg h <sup>-1</sup> mg <sup>-1</sup> <sub>cat.</sub>                                               | 1.9    | 9         |
| Fe <sub>2</sub> O <sub>3</sub> -CNT                              | KHCO <sub>3</sub>                     | 0.22 μg h <sup>-1</sup> cm <sup>-2</sup>                                                                | 0.15   | 10        |
| Fe <sub>3</sub> O <sub>4</sub> /Ti                               | 0.1 M Na <sub>2</sub> SO <sub>4</sub> | 3.43 μg h <sup>-1</sup> cm <sup>-1</sup>                                                                | 2.60   | 11        |
| Mo nanofilm                                                      | 0.01 M H <sub>2</sub> SO <sub>4</sub> | 1.89 μg h <sup>-1</sup> cm <sup>-2</sup>                                                                | 0.72   | 12        |
| MoO <sub>3</sub>                                                 | 0.1 M HCl                             | 29.43 μg h <sup>-1</sup> mg <sup>-1</sup> <sub>cat.</sub>                                               | 1.9    | 13        |
| MoS <sub>2</sub> /CC                                             | 0.1 M Na <sub>2</sub> SO <sub>4</sub> | 4.94 μg h <sup>-1</sup> cm <sup>-2</sup>                                                                | 1.17   | 14        |
| N-doped porous carbon                                            | 0.05 M H <sub>2</sub> SO <sub>4</sub> | 23.8 μg h <sup>-1</sup> mg <sup>-1</sup> <sub>cat.</sub>                                                | 1.42   | 15        |
| N-doped porous carbon                                            | 0.1 M HCl                             | 15.7 μg h <sup>-1</sup> mg <sup>-1</sup> <sub>cat.</sub>                                                | 1.45   | 16        |
| Mo <sub>2</sub> N                                                | 0.1 M HCl                             | 78.4 μg h <sup>-1</sup> mg <sup>-1</sup> <sub>cat.</sub>                                                | 4.5    | 17        |
| MoN                                                              | 0.1 M HCl                             | 18.42 μg h <sup>-1</sup> cm <sup>-2</sup>                                                               | 1.15   | 18        |
| VN                                                               | 0.1 M HCl                             | 5.14 μg h <sup>-1</sup> cm <sup>-2</sup>                                                                | 2.25   | 19        |
| Bi <sub>4</sub> V <sub>2</sub> O <sub>11</sub> /CeO <sub>2</sub> | 0.1 M HCl                             | 23.21 μg h <sup>-1</sup> mg <sup>-1</sup> <sub>cat.</sub>                                               | 10.16  | 20        |
| TiO <sub>2</sub> nanosheets                                      | 0.1 M Na <sub>2</sub> SO <sub>4</sub> | 5.6 μg h <sup>-1</sup> cm <sup>-2</sup>                                                                 | 2.50   | 21        |

|                                                                    |                                       |                                                           |       |    |
|--------------------------------------------------------------------|---------------------------------------|-----------------------------------------------------------|-------|----|
| Multishelled hollow<br>Cr <sub>2</sub> O <sub>3</sub> microspheres | 0.1 M Na <sub>2</sub> SO <sub>4</sub> | 25.3 μg h <sup>-1</sup> mg <sup>-1</sup> <sub>cat.</sub>  | 6.78  | 22 |
| B <sub>4</sub> C                                                   | 0.1 M HCl                             | 26.57 μg h <sup>-1</sup> mg <sup>-1</sup> <sub>cat.</sub> | 15.95 | 23 |

## References

- 1 D Y. Cai, G. Fang, J. Zhou, S. Liu, Z. Luo, A. Pan, G. Cao and S. Liang, *Nano Res.*, 2018, **11**, 449–463.
- 2 S. Li, D. Bao, M. Shi, B. Wulan, J. Yan and Q. Jiang, *Adv. Mater.*, 2017, **29**, 1700001.
- 3 M. Shi, D. Bao, B. Wulan, Y. Li, Y. Zhang, J. Yan and Q. Jiang, *Adv. Mater.*, 2017, **29**, 1606550.
- 4 D. Bao, Q. Zhang, F. Meng, H. Zhong, M. Shi, Y. Zhang, J. Yan and Q. Jiang and X. Zhang, *Adv. Mater.*, 2017, **29**, 1604799.
- 5 H. Liu, S. Han, Y. Zhao, Y. Zhu, X. L. Tian, J. Zeng, J. Jiang, B. Y. Xia and Y. Chen, *J. Mater. Chem. A*, 2018, **6**, 3211–3217.
- 6 M. Shi, D. Bao, S. Li, B. Wulan, J. Yan and Q. Jiang, *Adv. Energy Mater.*, 2018, **8**, 1800124.
- 7 J. Wang, L. Yu, L. Hu, G. Chen, H. Xin and X. Feng, *Nat. Commun.*, 2018, **9**, 1795.
- 8 G. Chen, X. Cao, S. Wu, X. Zeng, L. Ding, M. Zhu and H. Wang, *J. Am. Chem. Soc.*, 2017, **139**, 9771–9774.
- 9 J. Kong, A. Lim, C. Yoon, J. H. Jang, H. C. Ham, J. Han, S. Nam, D. Kim, Y.-E. Sung, J. Choi and H. S. Park, *ACS Sustainable Chem. Eng.*, 2017, **5**, 10986–10995.
- 10 S. Chen, S. Perathoner, C. Ampelli, C. Mebrahtu, D. Su and G. Centi, *Angew. Chem., Int. Ed.*, 2017, **56**, 2699–2703.
- 11 Q. Liu, X. Zhang, B. Zhang, Y. Luo, G. Cui, F. Xie and X. Sun, *Nanoscale*, 2018, **10**, 14386–14389.
- 12 D. Yang, T. Chen and Z. Wang, *J. Mater. Chem. A*, 2017, **5**, 18967–18971.
- 13 J. Han, X. Ji, X. Ren, G. Cui, L. Li, F. Xie, H. Wang, B. Li and X. Sun, *J. Mater. Chem. A*, 2018, **6**, 12974–12977.



- 14 L. Zhang, X. Ji, X. Ren, Y. Ma, X. Shi, Z. Tian, A. M. Asiri, L. Chen, B. Tang and X. Sun, *Adv. Mater.*, 2018, **30**, 1800191.
- 15 Y. Liu, Y. Su, X. Quan, X. Fan, S. Chen, H. Yu, H. Zhao, Y. Zhang and J. Zhao, *ACS Catal.*, 2018, **8**, 1186–1191.
- 16 X. Yang, K. Li, D. Cheng, W. Pang, J. Lv, X. Chen, H. Zang, X. Wu, H. Tan, Y. Wang and Y. Li, *J. Mater. Chem. A*, 2018, **6**, 7762–7769.
- 17 X. Ren, G. Cui, L. Chen, F. Xie, Q. Wei, Z. Tian and X. Sun, *Chem. Commun.*, 2018, **54**, 8474–8477.
- 18 L. Zhang, X. Ji, X. Ren, Y. Luo, X. Shi, A. M. Asiri, B. Zheng and X. Sun, *ACS Sustainable Chem. Eng.*, 2018, **6**, 9550–9554.
- 19 R. Zhang, Y. Zhang, X. Ren, G. Cui, A. M. Asiri, B. Zheng and X. Sun, *ACS Sustainable Chem. Eng.*, 2018, **6**, 9545–9549.
- 20 C. Lv, C. Yan, G. Chen, Y. Ding, J. Sun, Y. Zhou and G. Yu, *Angew. Chem., Int. Ed.*, 2018, **57**, 6073–6076.
- 21 R. Zhang, X. Ren, X. Shi, F. Xie, B. Zheng, X. Guo and X. Sun, *ACS Appl. Mater. Interfaces*, 2018, **10**, 28251–28255.
- 22 Y. Zhang, W. Qiu, Y. Ma, Z. Tian, G. Cui, F. Xie, L. Chen, T. Li and X. Sun, *ACS Catal.*, 2018, **8**, 8540–8544.
- 23 W. Qiu, X. Xie, J. Qiu, W. Fang, R. Liang, X. Ren, X. Ji, G. Cui, A. M. Asiri, G. Cui, B. Tang and X. Sun, *Nat. Commun.*, 2018, **9**, 3485.
